1 **Topical cream with live lactobacilli modulates the skin microbiome and reduce acne symptoms**

2 Sarah Lebeer<sup>1\*</sup>, Eline Oerlemans<sup>1\*</sup>, Ingmar Claes<sup>1\*</sup>, Sander Wuyts<sup>1</sup>, Tim Henkens<sup>2</sup>, Irina Spacova<sup>1</sup>,  
3 Marianne van den Broek<sup>1</sup>, Ines Tuyaearts<sup>1</sup>, Stijn Wittouck<sup>1</sup>, Ilke De Boeck<sup>1</sup>, Camille N. Allonsius<sup>1</sup>, Filip  
4 Kiekens<sup>2</sup>, Julien Lambert<sup>3</sup>

5 \*Equal contribution

6

7 <sup>1</sup> University of Antwerp, Department of Bioscience Engineering, Groenenborgerlaan 171, B-2020  
8 Antwerp, Belgium.

9 <sup>2</sup>University of Antwerp, Department of Pharmaceutical, Biomedical and Veterinary Sciences,  
10 Laboratory of Pharmaceutical Technology and Biopharmacy, Universiteitsplein 1, B-2610 Wilrijk,  
11 Belgium.

12 <sup>3</sup> University Hospital Antwerp/University of Antwerp Department of Dermatology and Venereology,  
13 Wilrijkstraat 10, 2650 Edegem, Belgium.

14 **Correspondence:** Sarah Lebeer, University of Antwerp, Department of Bioscience Engineering,  
15 Groenenborgerlaan 171, B-2020 Antwerp, Belgium. Telephone: +3232653285 E-mail:  
16 sarah.lebeer@uantwerpen.be

17

18 **Summary**

19 The skin is home to an important part of our commensal microbiota, despite it being a cool, acidic  
20 and desiccated environment. Tailored microbiome modulation approaches with, for example  
21 probiotics, are highly challenging for this body site. Here we show by next-generating sequencing  
22 that *Lactobacillus* taxa -especially those known to be dominant in the human vagina- are  
23 underestimated members of the skin microbiota. Specific *Lactobacillus* strains were selected in the

24 lab and formulated in a viable form in an oil in water-based topical cream. Facial application by  
25 patients with mild-to-moderate acne symptoms was able to reduce inflammatory lesions and  
26 comedone formation. This was associated with a temporary modulation of the skin microbiome,  
27 including a reduction in relative abundance of staphylococci and an increase in lactobacilli. Skin  
28 microbiome modulation by addition of carefully formulated lactobacilli seems to be new therapeutic  
29 option to reduce antibiotic use for common acne symptoms.

30

## 31 **Introduction**

32 Being the most extensive interface of the human body with the environment, the skin acts as a home  
33 to an important part of our commensal microbiota. Similar to the gut, the skin microbiota have  
34 essential roles in the education of our immune system and the protection against invading pathogens  
35 and other foreign substances. With recent advances in DNA sequencing approaches, our knowledge  
36 has been improved on the biogeography of the skin microbiota at different body sites<sup>1</sup>. We are now  
37 transitioning from these descriptive, observational studies towards a better understanding of the  
38 functional roles of the commensal microbiota, allowing the design of tailored modulation  
39 approaches. However, compared with the richer environment of our intestines, the skin lacks many  
40 nutrients beyond basic proteins and lipids, with sweat, sebum and the stratum corneum being main  
41 resources<sup>2</sup>. In addition, the skin is a cool, acidic and desiccated environment and skin cells are  
42 frequently renewed and shed, so that strategies targeting the skin microbiome are highly  
43 challenging. For example, probiotics, i.e. live micro-organisms that, when applied in adequate  
44 amounts, promote a health effect on the host<sup>3</sup>, have not yet been widely considered for direct  
45 application on the skin.

46 One of the most common skin diseases is acne vulgaris, a chronic inflammatory skin condition of the  
47 sebaceous follicles and glands. The pathogenesis of acne vulgaris is multifactorial, with increased  
48 sebum production, alteration in the quality of sebum lipids, dysregulation of the hormone

49 environment and follicular hyperkeratinization as contributing factors. In addition, specific strains of  
50 the facultative anaerobe *Cutibacterium acnes* (formerly known as *Propionibacterium acnes*<sup>4</sup>) are  
51 involved in the inflammation of the skin, especially by secreting lipase enzymes that are able to  
52 metabolize sebum into free fatty acids which may lead to skin irritation<sup>5</sup>. Yet, the observation that  
53 almost all adults are colonized with *C. acnes* but only a minority have acne, highlights that other  
54 bacteria such as *Staphylococcus* species can be linked to acne pathogenesis as pathobionts or disease  
55 modulators<sup>6</sup>. Therefore, both oral and topical antibiotics such as doxycycline, minocycline and  
56 clindamycin are frequently used by acne patients<sup>7</sup>, but because of rising problems of antibiotic  
57 resistance, various alternative therapies need to be developed<sup>8</sup>.

58 Here we explored the potential of topically applied, live probiotic lactobacilli to beneficially modulate  
59 cutaneous microbial interactions and host inflammatory responses in subjects with mild-to-moderate  
60 acne symptoms. Lactobacilli were selected based on their long history of safe use in fermented  
61 foods<sup>9</sup>, the gastro-intestinal<sup>10</sup>, urogenital tract<sup>11</sup> and nasal cavity<sup>12</sup>, but it was unsure whether  
62 lactobacilli could also thrive and have health-promoting activities on the skin.

## 63 **Results and discussion**

64 **Prevalence of *Lactobacillus* on the skin.** Because lactobacilli are not considered to be commensals of  
65 the skin, we first monitored the prevalence of lactobacilli on the skin of healthy volunteers. Their  
66 relative abundance was explored through 16S amplicon sequencing via Illumina MiSeq (separate runs  
67 for V1V2 and V4 variable regions) of facial skin samples (cheek) of 30 volunteers (15 male and 15  
68 female), who did not display acne-related symptoms. In the samples of all female volunteers and 12  
69 male volunteers *Lactobacillus* sequences were found (**Figure 1a**). *Lactobacillus* species generally did  
70 not occur in the top five of most abundant taxa present on the skin. However, some volunteers  
71 showed a relative high abundance of *Lactobacillus* taxa (amplicon sequence variants or ASVs), up to  
72 6.4% (based on V1V2 16S sequencing) or 14.3% (by V4 16S sequencing) (**Figure 1b, Extended data**  
73 **Figure 1a-b**). The relative abundance of *Lactobacillus* taxa based on both runs (V1V2 and V4) was

74 also 10-fold higher in women compared to men, with an average relative abundance of 0.8% (1.4% in  
75 women and 0.2% in men, Kruskal-Wallis  $p = 0.0005$ ). (**Extended Data Figure 1b**). *Lactobacillus* taxa  
76 can thus be considered as endogenous members of the skin microbiota, although their relative  
77 abundance is lower than *Staphylococcus*, *Corynebacterium*, *Cutibacterium* (often still classified as  
78 *Propionibacterium*), and *Streptococcus*, which were the most the dominant taxa in our dataset for  
79 both variable regions sequenced (**Extended Data figure 1 a**).

80 To confirm our in-house generated data and investigate whether our results are facial site-specific,  
81 the presence of lactobacilli was also substantiated in publicly available skin metagenome shotgun  
82 datasets by using the curatedMetagenomicData R-package recently described by Pasolli *et al.*<sup>13</sup>. In  
83 total, 466 samples from three different studies<sup>14, 15 and 16</sup> were analyzed. Of these samples, 38%  
84 (177/466) showed the presence of at least one *Lactobacillus* species (**Figure 1a**), but only 29 samples  
85 showed a relative abundance higher than 1%. Yet, high relative abundances up to 52% on the skin  
86 were also observed (average relative abundance based on curated metagenomics was 3.79%) (**Figure**  
87 **1b**). We also included 16S amplicon data from the Human Microbiome Project (V3V5)<sup>17</sup> where the  
88 relative abundance was 24.9% on average due to some outliers having up to 90% relative abundance  
89 (**Figure 1b**). The relative abundance of *Lactobacillus* sequences in the skin samples was also  
90 compared to the publicly available data of other human body sites (both 16S and curated  
91 metagenome) (**Figure 1b**). As expected, the vagina showed the highest relative abundance of  
92 *Lactobacillus* taxa, but the skin turned out to be the second most important niche for these taxa.  
93 Moreover, to have a better idea of the phylogenetic diversity of all *Lactobacillus* taxa present, we  
94 also plotted all data on a phylogenetic tree of the *Lactobacillus* genus complex<sup>18</sup> (**Figure 1c**). These  
95 data indicate that taxa typically associated with the human vagina, *Lactobacillus crispatus*, *L. iners*, *L.*  
96 *gasseri* and *L. jensenii* were also found as the most prevalent lactobacilli on the skin (**Figure 1d and**  
97 **1e**). Also members of the more niche-flexible *Lactobacillus* taxa<sup>19</sup>, *i.e.* from the *L. plantarum*/*L.*  
98 *pentosus* group and *L. casei/paracasei/rhamnosus* group, were frequently detected (**Figure 1d and**  
99 **1e**). The occurrence of *Lactobacillus* taxa on the skin is in agreement with the fact that after normal

100 delivery through the birth canal, these bacteria originating from the mother are among the first to  
101 colonize neonate skin<sup>20</sup>. The data presented here (**Figure 1 a-e**) indicate that these *Lactobacillus* taxa  
102 are still present in adults, but do not stay dominant in the different human body skin sites studied.  
103 Yet, despite their low relative abundance, they could still play a role as keystone microbes, recently  
104 redefined as taxa exerting a considerable influence on microbiome structure and functioning  
105 irrespective of their abundance across space and time<sup>21</sup>. Therefore, we subsequently aimed to  
106 manipulate biotic interactions of lactobacilli on the skin.

107

108 **Rationale *in vitro* strain selection.** *Lactobacillus* strains were selected from our in-house available  
109 laboratory collection (**Extended Data Table 1**) for tailored application in patients with mild-to  
110 moderate acne symptoms. A thorough screening approach was applied based on the rationalization  
111 that the strains had to be safe, applicable (being robust and showing niche-flexibility as described for  
112 lactobacilli by Duar *et al.*<sup>19</sup>) and have the capacity to exert the desired beneficial functions on the  
113 human skin including microbiome modulation, immune modulation and epithelial barrier  
114 enhancement (**Figure 2a**). Key properties were substantiated with laboratory tests, genome  
115 screening and information available in the literature. Three *Lactobacillus* strains were selected i.e.  
116 *Lactobacillus rhamnosus* GG, *Lactobacillus plantarum* WCFS1 and *L. pentosus* KCA1. The rationale for  
117 these strains was based on their genome availability<sup>22-24</sup>, knowledge of their host interaction capacity  
118 <sup>25,26</sup>, their robustness and growth capacity<sup>22,24,26</sup> (**Extended Data Figure 2a**), in addition to information  
119 on their safety in humans after oral<sup>27,28,29</sup>, nasal<sup>30</sup> and vaginal<sup>31</sup> high-dose application. *L. rhamnosus*  
120 GG was also selected because of previous reports on its capacity to inhibit the toxic effects of *S.*  
121 *aureus* on epidermal keratinocytes<sup>32</sup>, its strain-dependent capacity to promote re-epithelialization<sup>33</sup>  
122 and to augment tight-junction barrier function in human primary epidermal keratinocytes<sup>34</sup>, and our  
123 previous experience with this probiotic strain<sup>25</sup>. For microbiome modulation, *C. acnes* was targeted  
124 as model pathobiont associated with the inflammatory character of acne vulgaris. *S. aureus* was also  
125 targeted as an important pathogen causing skin inflammation. When the activity of spent culture

126 supernatant of our collection of *Lactobacillus* strains was screened for antimicrobial effects on the  
127 growth of *C. acnes* in suspension, all *Lactobacillus* strains tested inhibited the growth of *C. acnes*  
128 ATCC6919 and *S. aureus* ATCC29213, but *L. pentosus* KCA1 (vaginal origin) and *L. plantarum* WCFS1  
129 (saliva origin) were among the bacteria tested able to exert the highest inhibition (**Figure 2b and**  
130 **Extended Data Figure 2b**). Other related strains tested, including *Staphylococcus epidermidis* 12228,  
131 did not inhibit *C. acnes* growth (**Extended data Figure 2**). In addition, these strains were able to  
132 significantly reduce the lipase activity of *C. acnes* (Figure 2c). These lipase enzymes are involved in  
133 inflammation of the skin induced by *C. acnes*, because they metabolize sebum into free fatty acids  
134 which may lead to skin irritation<sup>5</sup>. Furthermore, because lactic acid has a strong antimicrobial  
135 activity<sup>35</sup>, as well as a documented dose-dependent capacity to ameliorate the appearance of  
136 keratoses and acne in dermatology<sup>36</sup>, we also substantiated lactic acid production by the selected  
137 lactobacilli (**Figure 2d**). Furthermore, we validated that the three selected lactobacilli did not exhibit  
138 toxic or overt inflammatory responses on primary skin cells (**Figure 2e**), in agreement with genome  
139 predictions<sup>22-24</sup> and laboratory validation of antibiotic resistance profiles according to the guidelines  
140 of the European Food Safety Authority (EFSA)<sup>37</sup>.

141

142 **Viable *Lactobacillus* formulation in O/W cream.** We then aimed to design a topical formulation  
143 suitable for the application of live bacteria in a sufficient dose on the skin. The selected bacteria were  
144 freeze-dried for stability reasons<sup>38</sup> and embedded in the core of 2-compartment microcapsules  
145 (**Figure 3a**). Various processing conditions were optimized as described in the Methods section and  
146 schematized in **Figure 3a**, resulting in capsules of 1500 - 2000  $\mu\text{m}$  diameter with a core of suspended  
147 freeze-dried bacteria that can be released upon applying mechanical pressure, such as rubbing on  
148 the skin (**Figure 3b**). Ingredients were selected so that they did not significantly impact on the growth  
149 capacity of the skin commensals and pathobionts (tested for *S. epidermis*, *S. aureus*, and *L. crispatus*)  
150 (**Extended Data Figure 2 c-d**). This formulation and encapsulation approach significantly improved

151 the viability for storage at 4°C and even at 25°C, compared to non-encapsulated freeze-dried bacteria  
152 when suspended in a carrier oil-in-water (O/W) cream (**Figure 3c**) and this for up to 6 months (**Figure**  
153 **3d**).

154 Subsequently, the skin irritation potential was checked for 20 volunteers with skin patch tests  
155 according to Basketter *et al.*<sup>39</sup>. No erythema, dryness or edema was observed in any of the  
156 volunteers studied (skin irritation index: 0.00) (**Extended Data Table 2**). For comparison, adapalene  
157 products, which are naphthoic acid derivatives with retinoid activity and documented efficacy in the  
158 treatment of mild-to-moderate acne vulgaris, have a mean cumulative irritation index between 0.25-  
159 1<sup>40</sup>. Also the widely used combined clindamycin–benzoylperoxide treatment for moderate acne has  
160 been reported to frequently induce dry skin, flaky/peeling skin, irritated skin, itchy skin and redness  
161 in acne patients<sup>41</sup>.

162

163 ***Lactobacillus* skin microbiome modulation.** Subsequently, we applied the topical cream twice daily  
164 in an open-label ‘proof-of-concept’ trial to ten volunteers for eight weeks twice daily at 10<sup>8</sup> CFU per  
165 application ( $\pm$  1 gram/application) (**Figure 4a**). Patients with mild-to-moderate acne symptoms that  
166 were not using antibiotics or another acne treatment were included by the responsible dermatologist  
167 (**Extended Data Table 3**). The impact of the *Lactobacillus* cream on their facial skin microbiome was  
168 monitored by 16S amplicon sequencing at four different time points, over a period of 10 weeks  
169 (**Figure 4a**). In this way, the skin baseline microbiome before, during and after the treatment was  
170 compared. The skin acne microbiome of these patients at the time of inclusion was especially  
171 characterized by an increased relative abundance of *Staphylococcus* taxa ( $p = 0.0058$ , Wilcoxon rank  
172 sum test) when compared to the healthy controls (**Figure 4b**) (**Extended Data Figure 4** for 3 specific  
173 *Staphylococcus* ASVs). No significant difference in relative abundance of *Lactobacillus* taxa was  
174 observed between our patients and the reference samples at time of inclusion (**Extended Data**  
175 **Figure 3a-b**). However, we did observe a significantly reduced relative abundance of *Streptococcus*

176 *salivarius*, a taxon also belonging to the lactic acid bacteria with lactic acid production as core  
177 function (**Extended Data Figure 4**). After application of the cream with the lactic-acid producing  
178 lactobacilli, the facial skin samples of our acne patients at visit 2 and visit 3 clearly clustered  
179 separately on a PCoA plot (**Figure 4c**). Interestingly, in 7 of 10 patients at visit 2 (4 weeks) and 8/10  
180 patients at visit 3 (8 weeks), *Lactobacillus* ASVs were found in relative high abundances (between  
181 20.9% and 92.8%), while in three patients at visit 2 and two patients at visit 3, their relative  
182 abundance was below 5% (between 0.015 and 1.1 %) (**Figure 4d and Extended Data Figure 3**). ASV  
183 analysis via EZ taxon<sup>42</sup> and comparison with the whole genome sequences<sup>22–24</sup> for rRNA copy variants  
184 confirmed that the detected ASVs matched the applied lactobacilli. Interestingly, the three probiotic  
185 strains appeared to persist on the skin in similar numbers (**Figure 4d**). To substantiate that the  
186 lactobacilli detected on the skin were still viable, samples were also plated on *Lactobacillus*-selective  
187 MRS agar. Most samples at visit 2 (7/9) and visit 3 (6/7) were culture-positive, indicating that – at  
188 least some of- the lactobacilli applied were metabolically active on the skin (**Figure 4d**). At visit 4 (two  
189 weeks after the stop of the treatment), most *Lactobacillus* ASVs had disappeared and also growth in  
190 MRS medium was markedly reduced, further substantiating that the lactobacilli detected originated  
191 from the applied topical cream. We then explored whether the presence of lactobacilli during  
192 treatment had impacted on the pathobionts of acne (*C. acnes* and *Staphylococcus* taxa). The relative  
193 abundance of both pathobiont taxa dropped indeed at visit 2 and 3 and increased again at visit 4 ( $p <$   
194 0.05 for visit 3 versus visit 1 – Wilcoxon test for *Staphylococcus*) (**Figure 4b**).

195 ***Lactobacillus* improvement of acne symptoms.** Subsequently, the acne symptoms were clinically  
196 scored as the presence of inflammatory lesions and comedones. This analysis showed an overall  
197 improvement of the acne symptoms in all patients treated with the *Lactobacillus* cream, as reflected  
198 by a significant reduction in inflammatory lesions at visit 2 and 3 compared to visit 1, and a significant  
199 reduction in comedone counts at visit 2 (**Figure 5a**). A significant association between comedonal  
200 counts and both *Staphylococcus* and *Propionibacterium/Cutibacterium* was also found (**Figure 5b**),  
201 but not for the inflammatory lesions (**Extended Data Figure 5**). Of note, when the treatment



202 stopped, the acne scores increased again, indicating that the applied lactobacilli and associated  
203 microbiome - staphylococcal modulation – did not persist, in agreement with the fact that the  
204 exogenously applied lactobacilli could not permanently colonize (**Figure 4 d**). On the other hand, this  
205 increase in acne scores when the *Lactobacillus* application stopped, further suggests a possible causal  
206 association between the applied lactobacilli and the acne symptom reduction.

207

## 208 **Conclusion**

209 Acne vulgaris is a common reason for long-term antibiotic use, with dermatologists prescribing  
210 antibiotics more commonly than any other physician group<sup>7</sup>. Here, we applied a multiphasic and  
211 multidisciplinary approach to substantiate that *Lactobacillus* strains have potential as skin probiotics  
212 to target acne. First, we provided detailed information that lactobacilli (and other lactic acid  
213 producing taxa) are unneglectable endogenous members of the human skin microbiota, with relative  
214 abundances in between those of human vaginal<sup>43</sup> and stool<sup>10</sup> samples. Of interest, phylogenetic  
215 placement of the *Lactobacillus* sequences detected in our data (amplicon sequence variants) and the  
216 curatedMetagenomicData recently described by Pasolli et al.<sup>13</sup> showed that the dominant  
217 *Lactobacillus* taxa (*L. crispatus*, *L. iners*, *L. gasseri*, *L. jensenii*) of the vaginal community are also  
218 among the most prevalent *Lactobacillus* taxa for the skin. Previous studies have briefly acknowledged  
219 the presence of lactobacilli in the skin microbiota<sup>44,45</sup>, however such detailed analysis of specific  
220 *Lactobacillus* taxa in the skin niche had not yet been performed. Yet, we also showed that to apply  
221 selected lactic acid bacteria on the skin, other properties such as robustness to (processing) stress  
222 conditions and growth capacity are required, in addition to safety and lack of (transferable) antibiotic  
223 resistance properties (as rationalized in **Figure 2a**). Following this rationalized scheme, we did  
224 manage to translate our results directly from *in vitro* lab tests with skin cells and pathogens to human  
225 volunteers, without the need for animal testing. Spent-culture supernatant of the selected *L.*  
226 *rhamnosus* GG, *L. plantarum* WCFS1 and *L. pentosus* KCA1 could inhibit the growth of *C. acnes* and *S.*

227 *aureus in vitro*, could survive the formulation in capsules in an O/W cream and were found in similar  
228 amounts after 1/1/1 application on the facial skin of patients with mild-to-moderate acne symptoms.  
229 Twice daily topical application of this cream with the live lactobacilli was able to reduce inflammatory  
230 acne lesions and comedone formation in the ten patients included in the open-label pilot study, and  
231 was associated with a reduction in *Staphylococcus* relative abundance (as summarized in **Figure 6**).  
232 Our 16S rRNA ASV-based comparison of the acne facial microbiome of 30 healthy volunteers and 27  
233 patients with acne symptoms suggests indeed that *Staphylococcus* taxa are increased in acne  
234 patients and that *Staphylococcus* could thus form an interesting acne target to further investigate.  
235 ASV level analysis of the sequenced V4 region of the 16S rRNA gene did not allow identification of the  
236 *Staphylococcus* taxa up to species/strain level, so that no distinction between *S. epidermidis* and *S.*  
237 *aureus* and specific more virulent strains could yet be made. On the other hand, microbiome  
238 comparison of the skin of subjects with a healthy skin and patients with mild-to-moderate acne  
239 vulgaris also pointed to other lactic acid producing bacteria such as *Streptococcus salivarius* as being  
240 potentially beneficial against acne.

241 Our findings are consistent with the growing body of evidence that lactic acid bacteria such as  
242 lactobacilli can be applied at multiple human body sites to target the microbiome, epithelial barrier  
243 function and immune system in various conditions<sup>35</sup>. In this study, we now add support for the skin  
244 as topical therapeutic area. Evidently, compliance of this probiotic therapy by the patients will be a  
245 key aspect to monitor – and possibly improve- in the future. The promising results from our proof-of-  
246 concept study with live lactic acid-producing microbes should now also be confirmed in larger-scale  
247 and longitudinal studies, in addition to more molecular studies towards underlying antimicrobial and  
248 anti-inflammatory mechanisms and probiotic effector molecules (**Figure 6**). Together, these studies  
249 will contribute to a new era of skin therapeutics based on microbiome modulation, as well as more  
250 fundamental and mechanistic insights on the keystone core functions of lactic acid bacteria for skin  
251 health.

252

Figures and figure legends

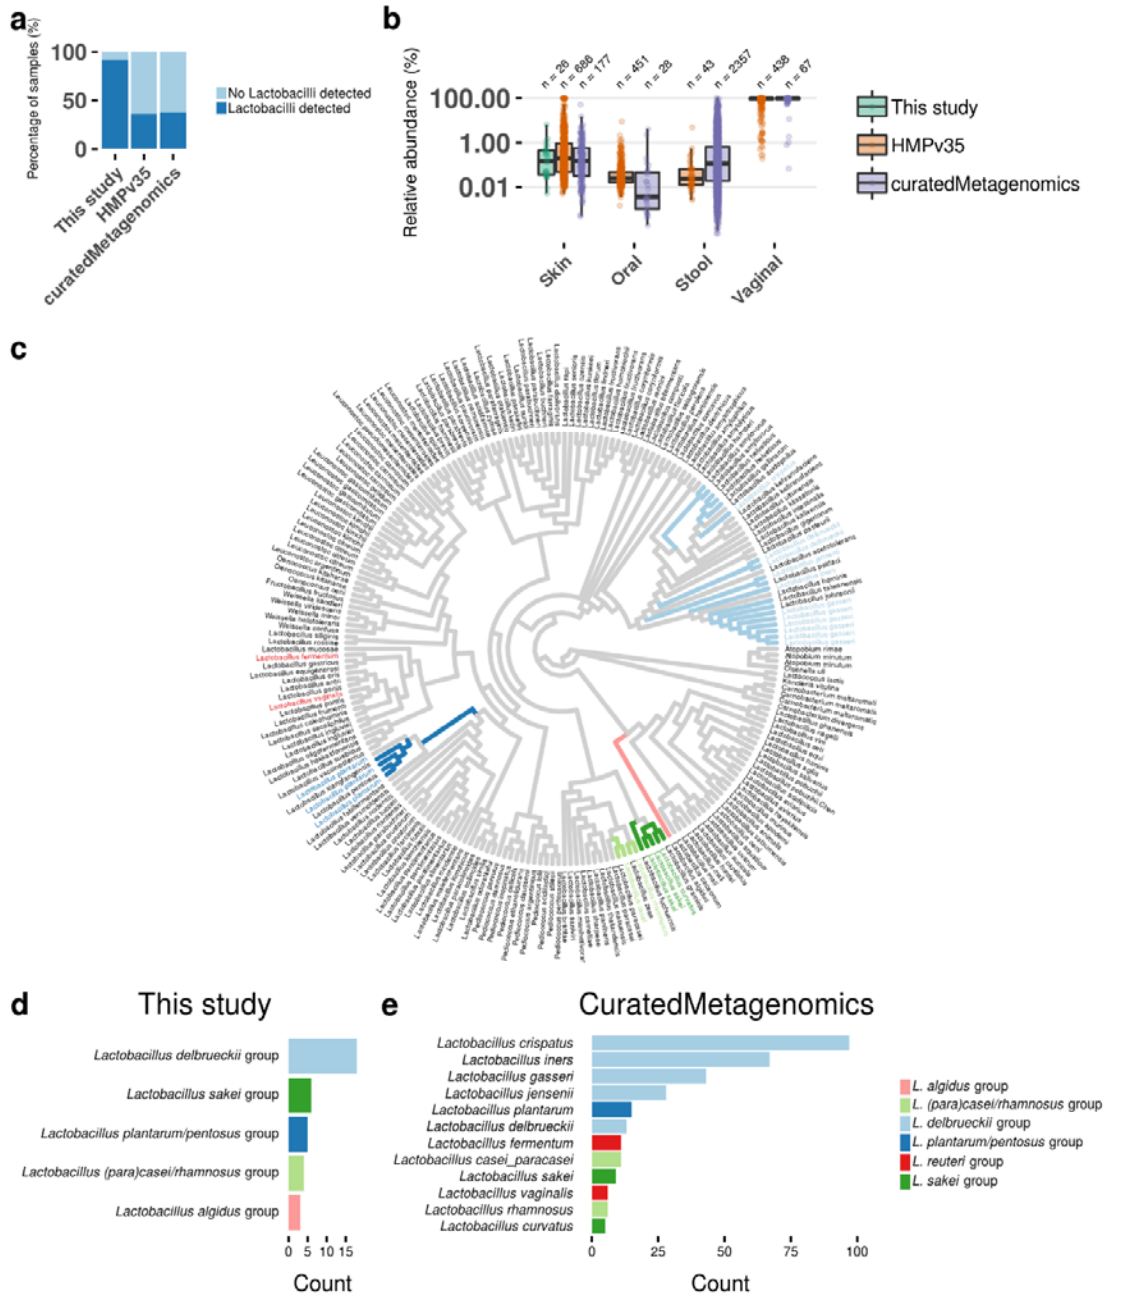

253

254

Figure 1 – *Lactobacillus* taxa in skin samples of 16S rRNA amplicon and shotgun metagenomic data

255

256

257

258

259

260

261

262

263

264

(a) Presence and absence of *Lactobacillus* in skin samples of this study, the Human Microbiome Project (HMPv35)<sup>46</sup> and shotgun metagenomic datasets from three studies<sup>14, 15 and 16</sup>, accessed through the curatedMetaganomics R Package. (b) Comparison of relative abundance of *Lactobacillus* in different niches of the three used datasets. The y-axis is represented in log scale. (c) 16S rRNA cladogram of the *Lactobacillus* Genus Complex. Branches are colored based on phylogenetic placement of *Lactobacillus* ASVs from this study and the phylogenetic group (as described by Duar *et al.*<sup>19</sup>) they belong to. Tip labels are colored based on the 12 most abundant *Lactobacillus* species found in the skin shotgun metagenomic datasets. (d and e) The most abundant *Lactobacillus* members in this study (d) and the skin shotgun metagenomic datasets (e) colored according to the phylogenetic group of the *Lactobacillus* Genus Complex they belong to.

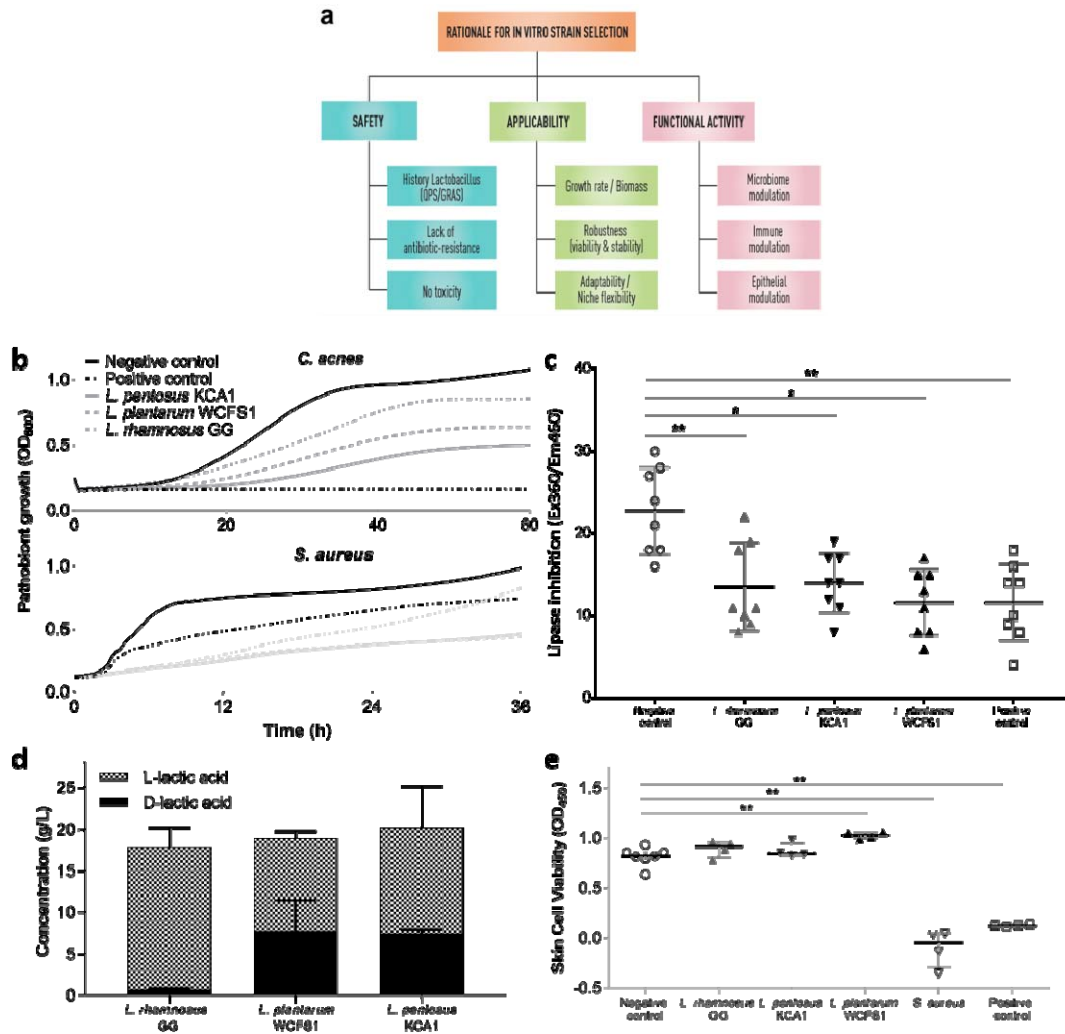

265

266 **Figure 2 - In vitro selection of *Lactobacillus* strains for targeted application against acne vulgaris.**

267 (a) Schematic overview of the rationale for the selection. Each criterion needs to be taken into  
 268 account upon selection. Laboratory or genomic prediction tests exist for each criterion. More  
 269 information can be found in the main text. (b) Antimicrobial activity of the spent-culture supernatant  
 270 of the selected *Lactobacillus* strains against the two pathobionts tested, *C. acnes* and *S. aureus*, and  
 271 compared to the positive control (10 mg/mL Clindamycin, a common antibiotic used in acne). MRS at  
 272 pH4, which is comparable to the pH of the spent supernatant of lactobacilli, was used as a negative  
 273 control. (c) Inhibition of lipase activity of *C. acnes* by the spent-culture supernatant of the selected  
 274 *Lactobacillus* strains, and compared to the positive control (10 mg/mL Clindamycin) and the negative  
 275 control (MRS). (d) Concentration of L-lactic acid and D-lactic acid as key antimicrobial and skin-  
 276 modulating molecules produced by the selected lactobacilli after overnight incubation in MRS broth.  
 277 (e) Skin cell viability results of NHEK cells after addition of the selected lactobacilli compared to the  
 278 negative control, keratinocyte growth medium 2, and positive controls, *S. aureus* and Triton-X,  
 279 measured at 450 nm using an XTT assay. Statistical analysis were performed using a Mann-Whitney  
 280 test where \* = p<0.05 and \*\* = p<0.01.

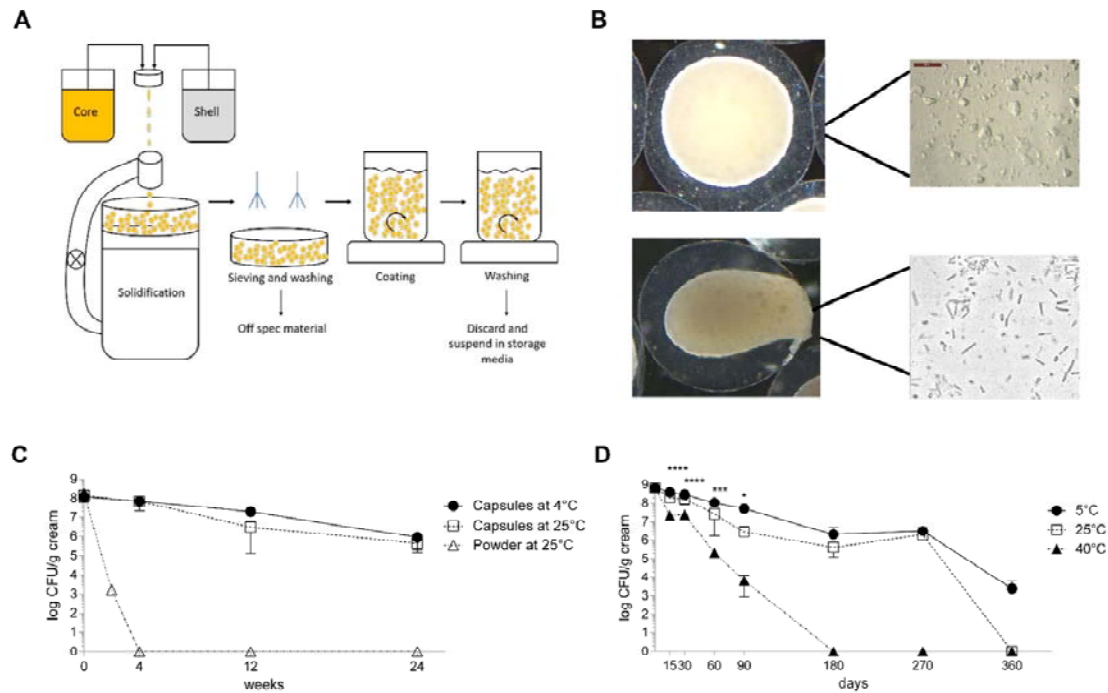

281  
282

**Figure 3 - Formulating live lactobacilli in a topical cream**

283 (a) Schematic representation of the micro-encapsulating process with the bacteria in the core  
 284 suspension and an outer shell made by the shell solution. (b) Resulting micro-capsules with a core of  
 285 freeze-dried bacteria suspended in oil compared to microcapsules in which a force is applied just  
 286 before application on the skin, hereby releasing the bacteria and activating them through water-  
 287 uptake. (c) Survival of the bacteria in the microcapsules after different days compared to non-  
 288 encapsulated freeze dried bacterial powder in an O/W cream. (d) Survival of the encapsulated  
 289 bacteria in o/w cream tested according to the International Council for Harmonisation of Technical  
 290 Requirements for Pharmaceuticals for Human Use Q1A(R2). Statistical analysis was performed using  
 291 a Two-way ANOVA where \* =  $p < 0.05$ , \*\*\* =  $p < 0.001$  and \*\*\*\* =  $p < 0.0001$ .

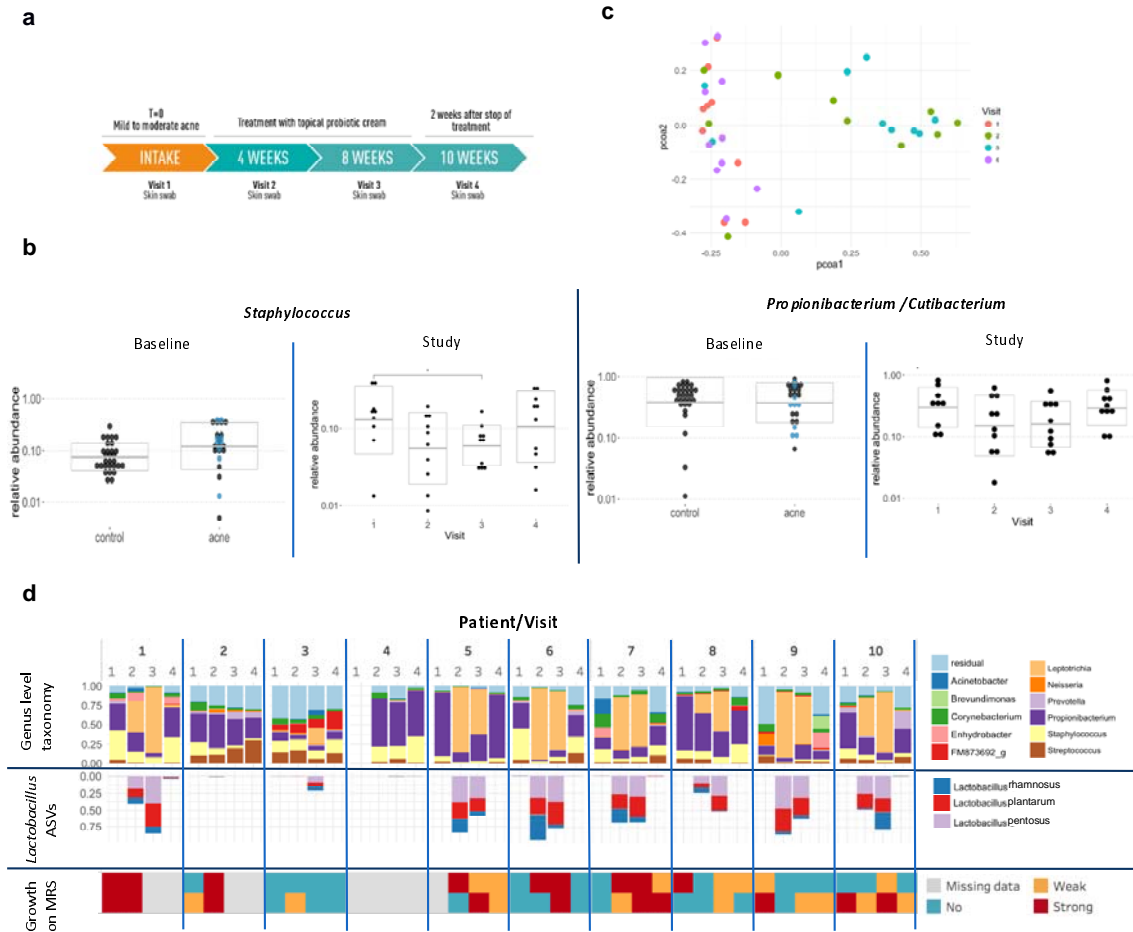

292

293

**Figure 4 – Impact of the *Lactobacillus* cream on the skin microbiome**

294 (a) Schematic overview of the POC intervention study with the O/W cream containing the selected  
 295 and formulated lactobacilli, the visits at which a skin swab was taken and dermatological symptom  
 296 analysis was performed by the dermatologist. The cream was applied twice daily for 8 weeks with a  
 297 minimal dose of  $10^6$  CFU/application. (b) Relative abundance of *Staphylococcus* and  
 298 *Propionibacterium/ Cutibacterium* respectively at baseline and over the four visits of the study  
 299 (right). For the baseline, skin samples of the 30 healthy volunteers without acne symptoms (cfr.  
 300 Figure 1) and 27 patients with mild-to-moderate acne symptoms were compared. Of these 27 acne  
 301 patients, 10 patients (indicated with blue dots) were included in the *Lactobacillus* intervention Study  
 302 (Study) shown at the right side of each panel. For the study visits,  $p < 0.05$  for visit 3 versus visit 1  
 303 based on Wilcoxon ranks test is indicated with a star. (c) PCOA plot distributing samples according to  
 304 beta-diversity (Bray-Curtis distance). Similar samples are located closely to each other, and colored  
 305 by visit. (d) Microbial communities during the study period with the genus-level taxonomy indicated  
 306 (top), relative abundance of the three *Lactobacillus* ASVs resulting from the cream (middle) and  
 307 observed growth on MRS medium (top row on agar, bottom row growth in MRS broth) after addition  
 308 of the skin samples (bottom). Other *Lactobacillus* ASVs were not observed at a higher relative  
 309 abundance than 1%. Samples were ordered by participant and by visit.

310

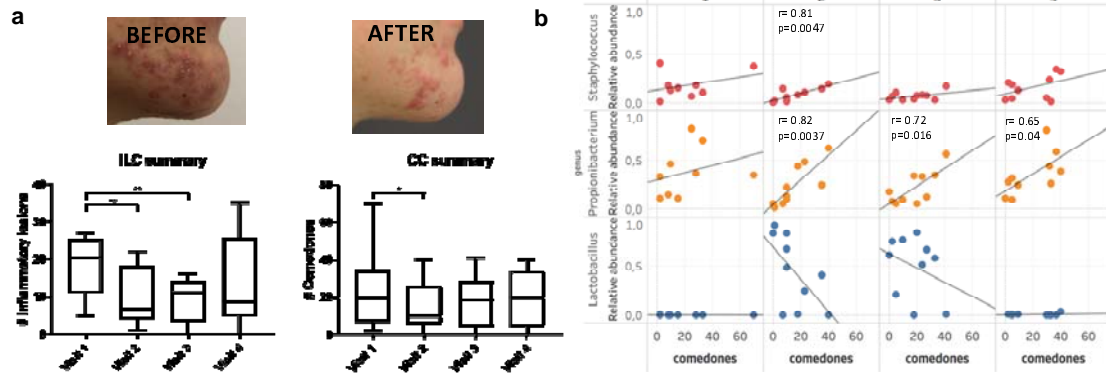

311

312

**Figure 5- Effect of the *Lactobacillus* cream on acne symptoms and correlation with microbiome data**

313

314

(a) Evolution of counts of inflammatory lesions (left) and comedones (right) over the course of the study, grouped by visit. All 10 patients included in the pilot study showed a clinical improvement after the application of the cream as exemplified with a picture of the acne spot area of one patients at visit 1 versus visit 2. Statistical analysis were performed using a Wilcoxon matched-pairs signed rank test where \* = p < 0.05 and \*\* = p < 0.01 (b) Correlation of relative abundances of *Staphylococcus* (top), *Propionibacterium/Cutibacterium* (middle) and *Lactobacillus* (bottom) to comedonal counts, per visit. Pearson correlation coefficient and p-values are indicated where p < 0.05.

319

320

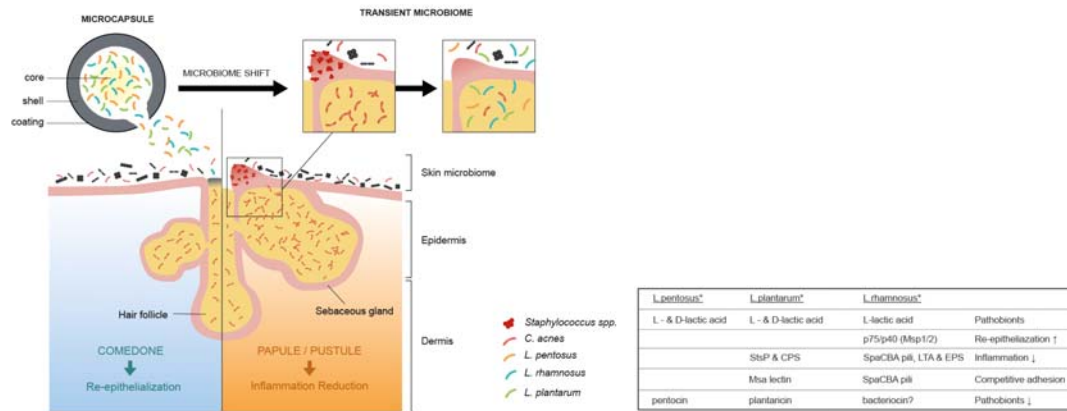

321

322 **Figure 6 - Schematic overview of the main findings of this study on how live lactobacilli formulated**  
 323 **in a topical cream modulate skin microbiome and improve acne symptoms.**

324 Specific *Lactobacillus* strains were selected and formulated in capsules in an oil (O) in water (W)  
 325 cream that release the probiotics upon rubbing on the skin. Microbiome analysis (16S amplicon  
 326 sequencing), as well as counting of comedone and inflammatory lesions substantiated that these  
 327 lactobacilli could reduce inflammation and comedone formation, as well have transient impact on  
 328 the skin microbiome, especially by decreasing the relative abundance of staphylococci and *C. acnes*  
 329 as acne pathobionts. The postulated mode of action (also indicated with \* in table) includes their  
 330 antimicrobial activity against pathobionts by lactic acid (this study), competitive exclusion<sup>47, 32</sup> and  
 331 possibly bacteriocins<sup>48,24</sup>, their capacity to reduce inflammation, e.g. by the serine-threonine rich  
 332 protein StsP of *L. plantarum* WCFS1<sup>49</sup> or SpaCBA pili of *L. rhamnosus* GG<sup>50,51</sup>, and their capacity to  
 333 promote re-epithelialization<sup>33,34</sup>, by e.g. the secreted proteins Msp1 (p75)/Msp2 (p40) for *L.*  
 334 *rhamnosus* GG<sup>29,52</sup>. Yet, the involvement of these probiotic effector molecules remains to be further  
 335 substantiated in follow-up work.



336 **Methods**

337 **Bacterial growth.** *Lactobacillus* strains were grown at 37°C in de Man, Rogosa and Sharpe (MRS)  
338 medium (BD Difco, Erembodegem, Belgium). *Propionibacterium acnes* ATCC6919 was inoculated in  
339 reinforced clostridial broth (LabM Limited, Heywood, UK), supplemented with 0.2% Tween20 and  
340 cultured microaerobically (5% CO<sub>2</sub>) at 37°C. *Staphylococcus aureus* ATCC29213 was grown in Mueller-  
341 Hinton broth at 37°C. Solid media contained 1.5% (w/v) agar. Time-course experiments were also  
342 performed analysing the antimicrobial activity of spent culture supernatant (SCS) of the selected  
343 *Lactobacillus* strains against *C. acnes* and *S. aureus* ATCC29213 (cfr. <sup>53</sup>). Additionally, the impact of  
344 this SCS (10%) on the lipase activity of *C. acnes* was determined as previously described <sup>5</sup>.

345 **Human skin cell culture.** Normal human epidermal keratinocytes (NHEK) cells from juvenile foreskin  
346 from pooled donors were purchased from Promocell (Heidelberg, Germany) and cultured according  
347 to manufacturer's recommendations in Keratinocyt Growth medium 2 (Promocell, Heidelberg,  
348 Germany). Cytotoxicity of probiotic strains was assessed using the 2,3-Bis(2-methoxy-4-nitro-5-  
349 sulfophenyl)-2H-tetrazolium-5-carboxanilide (XTT, Sigma-Aldrich) cell viability assay. NHEK cells were  
350 seeded at a density of 5000 cells/well in 96-well plates and cultured until confluent. Overnight  
351 cultures of probiotic strains or *S. aureus* were added to the wells with or without NHEK cells at 10<sup>6</sup>  
352 CFU/well and incubated for 2 h at 5% CO<sub>2</sub> and 37°C. Triton X-100 (0.5%) was used as a positive  
353 control.

354 **Collection of skin samples and total microbial DNA extractions.** Skin samples were collected by  
355 brushing the cheek (control group) or the affected area on the face (patients) with a FloqSwab  
356 (Copan) over an area of ± 10 cm<sup>2</sup> or around the lesions. Swabs were then transferred to a falcon  
357 containing 800µl Bead solution of QIAamp PowerFecal DNA kit (Qiagen). Samples were stored at 4°C  
358 until further processing (maximally 14 days). Before DNA extraction, samples were vortexed for 1  
359 minute, after which the Bead solution was transferred to the bead tube. Subsequent steps of the  
360 DNA extraction were executed according to manufacturer's instructions.

361 **Illumina MiSeq 16S rDNA gene amplicon sequencing.** The primers used for Illumina MiSeq  
362 sequencing were based on the previously described 27F-338R or 515F-806R primers<sup>54</sup> and altered for  
363 dual-index paired-end sequencing, as described earlier<sup>55</sup> (**Extended Data Table 4**). Separate runs  
364 were carried out for V1V2 and V4 rRNA gene variable regions. Quality control and processing of reads  
365 was performed using the R package DADA2, version 1.6.0<sup>56</sup>. Denoised reads (amplicon sequence  
366 variants or ASVs) were merged and read pairs with one or more conflicting bases between the  
367 forward and reverse read were removed. Chimeric sequences were removed using the function  
368 “removeBimeraDenovo”. Finally, ASVs were classified from the kingdom to the genus level using the  
369 EzBioCloud 16S database<sup>42</sup>. A species annotation was added to each ASV by listing the species of all  
370 16S sequences in the database that showed an exact match to the ASV sequence. Contaminants  
371 were identified using the approach of Jervis-Bardy *et al*<sup>57</sup>. ASVs with a strong negative correlation  
372 between relative abundances and total sample read counts were considered contamination. For each  
373 ASV, this correlation was calculated and tested for significance. ASVs with a p-value less than 0.0001  
374 were removed. Samples were filtered by removing those with less than 1000 reads left after all read  
375 and ASV filtering steps.

376 **Biostatistical and bioinformatics analysis.** Processing of the ASV table, ASV annotations (e.g.  
377 classification) and sample annotations (metadata) were performed using the in-house R package  
378 “tidyamplicons”, publicly available at [github.com/SWittouck/tidyamplicons](https://github.com/SWittouck/tidyamplicons). For the analyses at the  
379 genus level, ASV read counts were aggregated at the genus level or, if unavailable, at the most  
380 specific level at which taxonomic annotation was available.

381 **Analysis of public datasets.** Processed OTU-table and sample metadata from the Human Microbiome  
382 Project (HMPv35)<sup>46</sup> and the shotgun metagenomic datasets were retrieved using the MicrobeDS R  
383 package and curatedMetagenomics R package<sup>16</sup> respectively. All data was loaded, processed and  
384 visualized in the R-environment using Phyloseq. All scripts are available at  
385 [https://github.com/LebeerLab/skin\\_acne\\_study](https://github.com/LebeerLab/skin_acne_study).

386 **qPCR for estimation of absolute bacterial concentrations.** qPCR was performed in duplicate on a 20-  
387 fold dilution (to avoid interference of PCR inhibitors) of total DNA isolated from the samples, using  
388 the StepOnePlus real time qPCR system (Applied Biosystems®, Foster City, California, USA), SYBR®  
389 Green chemistry (PowerUp™ SYBR® Green Master Mix, Applied Biosystems®, Foster City, California,  
390 USA) and primers as indicated in **Extended Data Table 4**. Standard curves were used to estimate  
391 bacterial concentrations in the samples and derived from serially diluted DNA from an overnight  
392 culture of *Lactobacillus crispatus* LMG12005 isolated similarly as the samples. Bacterial concentration  
393 was determined by plating.

394 **Formulation of lactobacilli in microcapsules and O/W cream.** A single colony of the three selected  
395 probiotic strains was grown until stationary phase and lyophilized. The lyophilized bacterial powder  
396 was grinded and milled (Frewitt, Switzerland) to obtain a fine powder ( $\pm 10^{11}$  CFU/gram) and  
397 subsequently encapsulated via a core-shell encapsulation approach. Briefly, the strains were mixed in  
398 equal amounts and homogeneously suspended to obtain a stable oil-based feed core suspension.  
399 The shell feed solution contained a hydrocolloid alginate polymer as gelling agent. Both liquid feeds  
400 were pumped to a concentric nozzle, to obtain a concentric fluid flow. The laminar liquid flow was  
401 broken up by a vibrational unit to obtain spherical -droplets that were solidified upon falling in a  
402 calcium-based solidification solution, forming the capsules. The collected capsules ( $10^9$  -  $10^{10}$   
403 CFU/gram) were washed and suspended in an oil-in-water cream containing the following  
404 ingredients: Aqua, Glycerin, Polyglyceryl-3 Rice Branate, Propylheptyl Caprylate, Cetyl Alcohol, Nylon  
405 6/12, Caprylic/Capric Triglyceride, Squalane, PEG-400, Cyclopentasiloxane, Cetearyl Alcohol, Prunus  
406 Amygdalus Dulcis Oil, Allantoin, Limnanthes Alba Seed Oil, Tocopheryl Acetate, Xanthan Gum,  
407 Cyclohexasiloxane, Helianthus Annuus Seed Oil, Algin, p-Anisic Acid, Silica Dimethyl Silylate, Disodium  
408 EDTA, Sodium Hydroxide, Hydrochloric Acid. The ingredients of this cream, mainly the emulsifiers  
409 and preservatives, were selected to be compatible with the micro-capsules and bacteria, both during  
410 storage and upon release of the probiotics. Hereto, the impact of the topical cream without the  
411 capsules on the growth of four skin reference bacteria (*S. aureus*, *S. epidermidis*, *L. crispatus* and *C.*

412 *acnes*) was evaluated at a concentration of 1, 10 and 100 mg/ml, by a time-course analysis of OD600  
413 measurements as described above. Mechanical force (rubbing on the skin) was confirmed to break  
414 the capsules, releasing the inner core material containing the suspended probiotics. Skin irritation  
415 tests with the O/W cream containing the freeze –dried lactobacilli were performed as described  
416 previously<sup>39</sup>.

417 **Proof-of-concept human in patients with acne vulgaris.** A proof-of-concept clinical trial was  
418 performed on patients with mild-to-moderate acne vulgaris included after careful assessment of the  
419 responsible dermatologist by counting of comedones and inflammatory lesions (**Extended Data**  
420 **Table 3**). Patients were men between 12-25 years. Exclusion criteria were use of oral antibiotics  
421 within 4 weeks prior to start of the study and use of systemic retinoids within 6 months prior to start  
422 of study. Subjects provided written informed consent before the study began. Patients were asked to  
423 apply the topical probiotic cream (containing 10<sup>8</sup> CFU of each *Lactobacillus* strain per application of 1  
424 g of the topical cream). Patients were asked to apply the cream twice daily for 56 days (8 weeks). The  
425 patients were seen by a dermatologist at start (before the therapy) (visit 1), week 4 (visit 2), week 8  
426 (visit 3) and week 10 (visit 4). A skin swab was taken at each visit, total DNA was extracted and  
427 amplified for 16S amplicon sequencing as described above. Moreover, a clinical scoring was  
428 performed and a photograph taken at each visit.

429

430 **Clinical trial registration.** The protocol of this study was in accordance with the Declaration of  
431 Helsinki, and was approved by the ethics committee of the University Hospital of Antwerp (Belgium)  
432 before initiation of the study. The study was given the approval number B300201628507 (Belgian  
433 registration) and registered online at [clinicaltrials.gov](http://clinicaltrials.gov) with unique identifier NCT03469076.

434

435 **Data availability.** Sequencing data are available at the European Nucleotide Archive with the  
436 accession number PRJEB27311.

437

438 **References**

- 439 1. Grice, E. A. *et al.* Topographical and temporal diversity of the human skin microbiome. *Science*  
440 (80-. ). **324**, 1190–1192 (2009).
- 441 2. Byrd, A. L., Belkaid, Y. & Segre, J. A. The human skin microbiome. *Nature Reviews*  
442 *Microbiology* **16**, 143–155 (2018).
- 443 3. Hill, C. *et al.* Expert consensus document: The International Scientific Association for  
444 Probiotics and Prebiotics consensus statement on the scope and appropriate use of the term  
445 probiotic. *Nat. Rev. Gastroenterol. Hepatol.* **11**, 506–514 (2014).
- 446 4. Scholz, C. F. P. & Kilian, M. The natural history of cutaneous propionibacteria, and  
447 reclassification of selected species within the genus propionibacterium to the proposed novel  
448 genera acidipropionibacterium gen. Nov., cutibacterium gen. nov. and  
449 pseudopropionibacterium gen. nov. *Int. J. Syst. Evol. Microbiol.* **66**, 4422–4432 (2016).
- 450 5. Higaki, S. Lipase inhibitors for the treatment of acne. *Journal of Molecular Catalysis B:*  
451 *Enzymatic* **22**, 377–384 (2003).
- 452 6. Dréno, B. What is new in the pathophysiology of acne, an overview. *Journal of the European*  
453 *Academy of Dermatology and Venereology* (2017). doi:10.1111/jdv.14374
- 454 7. Del rosso, J. Q. *et al.* Status report from the scientific panel on antibiotic use in dermatology of  
455 the American acne and rosacea society part 1: Antibiotic prescribing patterns, sources of  
456 antibiotic exposure, antibiotic consumption and emergence of antibiotic resistance, impac. *J.*  
457 *Clin. Aesthet. Dermatol.* (2016).
- 458 8. Williams, H. C., Dellavalle, R. P. & Garner, S. Acne vulgaris. in *The Lancet* **379**, 361–372 (2012).
- 459 9. Bernardeau, M., Guguen, M. & Vernoux, J. P. Beneficial lactobacilli in food and feed: Long-

- 460 term use, biodiversity and proposals for specific and realistic safety assessments. *FEMS*  
461 *Microbiology Reviews* (2006). doi:10.1111/j.1574-6976.2006.00020.x
- 462 10. Heeney, D. D., Gareau, M. G. & Marco, M. L. Intestinal *Lactobacillus* in health and disease, a  
463 driver or just along for the ride? *Current Opinion in Biotechnology* **49**, 140–147 (2018).
- 464 11. Petrova, M. I., Lievens, E., Malik, S., Imholz, N. & Lebeer, S. *Lactobacillus* species as biomarkers  
465 and agents that can promote various aspects of vaginal health. *Frontiers in Physiology* **6**,  
466 (2015).
- 467 12. Mårtensson, A. *et al.* Effects of a honeybee lactic acid bacterial microbiome on human nasal  
468 symptoms, commensals, and biomarkers. *Int. Forum Allergy Rhinol.* **6**, 956–963 (2016).
- 469 13. Pasolli, E. *et al.* Accessible, curated metagenomic data through ExperimentHub. *Nature*  
470 *Methods* **14**, 1023–1024 (2017).
- 471 14. Chng, K. R. *et al.* Whole metagenome profiling reveals skin microbiome-dependent  
472 susceptibility to atopic dermatitis flare. *Nat. Microbiol.* **1**, (2016).
- 473 15. Oh, J. *et al.* Biogeography and individuality shape function in the human skin metagenome.  
474 *Nature* **514**, 59–64 (2014).
- 475 16. Tett, A. *et al.* Unexplored diversity and strain-level structure of the skin microbiome  
476 associated with psoriasis. *npj Biofilms Microbiomes* **3**, 14 (2017).
- 477 17. Huttenhower, C. & Human Microbiome Project Consortium. Structure, function and diversity  
478 of the healthy human microbiome. *Nature* (2012). doi:10.1038/nature11234
- 479 18. Wuyts, S. *et al.* Carrot juice fermentations as man-made microbial ecosystems dominated by  
480 lactic acid bacteria. *Appl. Environ. Microbiol.* (2018). doi:10.1128/AEM.00134-18
- 481 19. Duar, R. M. *et al.* Lifestyles in transition: evolution and natural history of the genus  
482 *Lactobacillus*. *FEMS Microbiol. Rev.* **41**, S27–S48 (2017).

- 483 20. Chu, D. M. *et al.* Maturation of the infant microbiome community structure and function  
484 across multiple body sites and in relation to mode of delivery. *Nat. Med.* **23**, 314–326 (2017).
- 485 21. Banerjee, S., Schlaeppi, K. & van der Heijden, M. G. A. Keystone taxa as drivers of microbiome  
486 structure and functioning. *Nature Reviews Microbiology* (2018). doi:10.1038/s41579-018-  
487 0024-1
- 488 22. Kankainen, M. *et al.* Comparative genomic analysis of *Lactobacillus rhamnosus* GG reveals pili  
489 containing a human-mucus binding protein. *Proc. Natl. Acad. Sci. U. S. A.* **106**, (2009).
- 490 23. Kleerebezem, M. *et al.* Complete genome sequence of *Lactobacillus plantarum* WCFS1. *Proc.*  
491 *Natl. Acad. Sci.* **100**, 1990–1995 (2003).
- 492 24. Anukam, K. C. *et al.* Genome Sequence of *Lactobacillus pentosus* KCA1: Vaginal Isolate from a  
493 Healthy Premenopausal Woman. *PLoS One* **8**, e59239 (2013).
- 494 25. Segers, M. E. & Lebeer, S. Towards a better understanding of *Lactobacillus rhamnosus* GG -  
495 host interactions. *Microb. Cell Fact.* **13**, S7 (2014).
- 496 26. van den Nieuwboer, M., van Hemert, S., Claassen, E. & de Vos, W. M. *Lactobacillus plantarum*  
497 WCFS1 and its host interaction: a dozen years after the genome. *Microbial Biotechnology* **9**,  
498 452–465 (2016).
- 499 27. Tapiovaara, L. *et al.* Absence of adverse events in healthy individuals using probiotics -  
500 analysis of six randomised studies by one study group. *Benef. Microbes* **7**, 161–169 (2016).
- 501 28. van Baarlen, P. *et al.* Differential NF- $\kappa$ B pathways induction by *Lactobacillus plantarum* in the  
502 duodenum of healthy humans correlating with immune tolerance. *Proc. Natl. Acad. Sci.*  
503 (2009). doi:10.1073/pnas.0809919106
- 504 29. van Baarlen, P. *et al.* Human mucosal in vivo transcriptome responses to three lactobacilli  
505 indicate how probiotics may modulate human cellular pathways. *Proc. Natl. Acad. Sci. U. S. A.*

- 506           **108 Suppl**, 4562–4569 (2011).
- 507       30.   Skovbjerg, S. *et al.* Spray bacteriotherapy decreases middle ear fluid in children with secretory  
508           otitis media. *Arch. Dis. Child.* **94**, 92–98 (2009).
- 509       31.   Reid, G. & Bruce, A. W. Selection of Lactobacillus Strains for Urogenital Probiotic Applications.  
510           *J. Infect. Dis.* **183**, 77–80 (2001).
- 511       32.   Mohammedsaeed, W., McBain, A. J., Cruickshank, S. M. & O’Neill, C. A. Lactobacillus  
512           rhamnosus GG inhibits the toxic effects of Staphylococcus aureus on epidermal keratinocytes.  
513           *Appl. Environ. Microbiol.* **80**, 5773–5781 (2014).
- 514       33.   Mohammedsaeed, W., Cruickshank, S., McBain, A. J. & O’Neill, C. A. Lactobacillus rhamnosus  
515           GG Lysate Increases Re-Epithelialization of Keratinocyte Scratch Assays by Promoting  
516           Migration. *Sci. Rep.* **5**, (2015).
- 517       34.   O’Neill, C. A., Sultana, R. & McBain, A. J. Strain-dependent augmentation of tight-junction  
518           barrier function in human primary epidermal keratinocytes by lactobacillus and  
519           bifidobacterium lysates. *Appl. Environ. Microbiol.* **79**, 4887–4894 (2013).
- 520       35.   Sanders, M. E., Benson, A., Lebeer, S., Merenstein, D. J. & Klaenhammer, T. R. Shared  
521           mechanisms among probiotic taxa: implications for general probiotic claims. *Curr. Opin.*  
522           *Biotechnol.* **49**, (2018).
- 523       36.   Tang, S. C. & Yang, J. H. Dual effects of alpha-hydroxy acids on the skin. *Molecules* **23**, (2018).
- 524       37.   European Food Safety Authority. Guidance on the assessment of bacterial susceptibility to  
525           antimicrobials of human and veterinary importance. *EFSA J.* (2012).  
526           doi:10.2903/j.efsa.2012.2740.
- 527       38.   Broeckx, G., Vandenheuvel, D., Claes, I. J. J., Lebeer, S. & Kiekens, F. Drying techniques of  
528           probiotic bacteria as an important step towards the development of novel pharmabiotics. *Int.*



- 529 *J. Pharm.* **505**, (2016).
- 530 39. Basketter, D. A., Whittle, E., Griffiths, H. A. & York, M. The identification and classification of  
531 skin irritation hazard by a human patch test. *Food Chem. Toxicol.* **32**, 773–775 (1994).
- 532 40. Queille-Roussel, C. *et al.* Comparison of the cumulative irritation potential of adapalene gel  
533 and cream with that of erythromycin/tretinoin solution and gel and erythromycin/isotretinoin  
534 gel. *Clin. Ther.* **23**, 205–212 (2001).
- 535 41. Feldman, S. R. & Chen, D. M. How Patients Experience and Manage Dryness and Irritation  
536 From Acne Treatment. *J Drugs Dermatol* (2011).
- 537 42. Yoon, S. H. *et al.* Introducing EzBioCloud: A taxonomically united database of 16S rRNA gene  
538 sequences and whole-genome assemblies. *Int. J. Syst. Evol. Microbiol.* (2017).  
539 doi:10.1099/ijsem.0.001755
- 540 43. Petrova, M. I., Lievens, E., Malik, S., Imholz, N. & Lebeer, S. Lactobacillus species as biomarkers  
541 and agents that can promote various aspects of vaginal health. *Front. Physiol.* **6**, (2015).
- 542 44. Zeeuwen, P. L. J. M. *et al.* Microbiome dynamics of human epidermis following skin barrier  
543 disruption. *Genome Biol.* (2012). doi:10.1186/gb-2012-13-11-r101
- 544 45. Li, X., Yuan, C., Xing, L. & Humbert, P. Topographical diversity of common skin microflora and  
545 its association with skin environment type: An observational study in Chinese women. *Sci.*  
546 *Rep.* (2017). doi:10.1038/s41598-017-18181-5
- 547 46. Human, T. & Project, M. Structure, function and diversity of the healthy human microbiome.  
548 *Nature* (2012). doi:10.1038/nature11234
- 549 47. Tytgat, H. L. P. *et al.* Lactobacillus rhamnosus GG Outcompetes Enterococcus faecium via  
550 Mucus-Binding Pili: Evidence for a Novel and Heterospecific Probiotic Mechanism. *Appl.*  
551 *Environ. Microbiol.* **82**, 5756–5762 (2016).

- 552 48. Diep, D. B., Straume, D., Kjos, M., Torres, C. & Nes, I. F. An overview of the mosaic bacteriocin  
553 pln loci from *Lactobacillus plantarum*. *Peptides* (2009). doi:10.1016/j.peptides.2009.05.014
- 554 49. Remus, D. M., Kleerebezem, M. & Bron, P. A. An intimate tête-à-tête - How probiotic  
555 lactobacilli communicate with the host. in *European Journal of Pharmacology* **668**, (2011).
- 556 50. Lebeer, S. *et al.* Functional analysis of *Lactobacillus rhamnosus* GG pili in relation to adhesion  
557 and immunomodulatory interactions with intestinal epithelial cells. *Appl. Environ. Microbiol.*  
558 **78**, (2012).
- 559 51. Vargas García, C. E. *et al.* Piliation of *Lactobacillus rhamnosus* GG promotes adhesion,  
560 phagocytosis, and cytokine modulation in macrophages. *Appl. Environ. Microbiol.* **81**, (2015).
- 561 52. Yan, F. *et al.* A *Lactobacillus rhamnosus* GG-derived soluble protein, p40, stimulates ligand  
562 release from intestinal epithelial cells to transactivate epidermal growth factor receptor. *J.*  
563 *Biol. Chem.* **288**, 30742–30751 (2013).
- 564 53. van den Broek, M. F. L. Multifactorial inhibition of lactobacilli against the respiratory tract  
565 pathogen *Moraxella catarrhalis*. *Benef. Microbes* **9**, 429–439 (2018).
- 566 54. Caporaso, J. G. *et al.* Global patterns of 16S rRNA diversity at a depth of millions of sequences  
567 per sample. *Proc Natl Acad Sci USA* **108**, (2010).
- 568 55. Kozich, J. J., Westcott, S. L., Baxter, N. T., Highlander, S. K. & Schloss, P. D. Development of a  
569 dual-index sequencing strategy and curation pipeline for analyzing amplicon sequence data on  
570 the MiSeq Illumina sequencing platform. *Appl. Environ. Microbiol.* **79**, 5112–20 (2013).
- 571 56. Callahan, B. J. *et al.* DADA2: High-resolution sample inference from Illumina amplicon data.  
572 *Nat. Methods* **13**, 581–583 (2016).
- 573 57. Jervis-Bardy, J. *et al.* Deriving accurate microbiota profiles from human samples with low  
574 bacterial content through post-sequencing processing of Illumina MiSeq data. *Microbiome*

575 (2015). doi:10.1186/s40168-015-0083-8

576

577 **Extended Data** is available in the online version of this manuscript.

578 **Acknowledgements.** We kindly acknowledge Dr. K. Anukam for providing us *Lactobacillus pentosus*  
579 KCA1. We thank Wannes Van Beeck, Dieter Vandenheuvel, Camille Allonsius, Leen Van Ham and all  
580 other members of the ENdEMIC group for their assistance and/or fruitful discussions. We thank S.  
581 Van Elslander for the help in the design of figures 2A, 4A and 6. We also greatly thank Dr. E. Pasolli  
582 for the assistance with the CuratedMetagenomics Package. This work was funded by grants from the  
583 Flanders Agency for Innovation & Entrepreneurship ([www.vlaio.be/en](http://www.vlaio.be/en)), including an IWT-SBO project  
584 (IWT/50052) for the fundamental part of the research and a VLAIO R&D project with Yun  
585 Probiotherapy NV (formerly known as Axca Bvba) as SME partner for the applied part of the project.  
586 The qPCR analyses were performed with a StepOne Plus (Applied Biosystems) machine funded by the  
587 Fund for Scientific Research Flanders (1520114N). Sander Wuyts and Ilke De Boeck hold a personal  
588 PhD grant (IWT-SB 141198 and FWO 1S17916N respectively).

589 **Author contributions.** S.L., I.C., J.L. designed the study; J.L. clinically evaluated the patients and  
590 collected patient samples; E.O. prepared the clinical and control samples for MiSeq sequencing with  
591 the help of I.T. and I.D.B., Sa.Wu. did the shotgun metagenome analysis, Sa.Wu. St.Wi., and E.O.  
592 analyzed sequence data. E.O., M.V.B., C.A. and I.S. did part of the microbiological and cell culture lab  
593 experiments. I.C., T.H., F.K. formulated the lactobacilli in the topical cream. S.L. drafted the  
594 manuscript and all authors approved the manuscript.

595

596 **Author information.** The authors declare the following competing interests. I.C. and T.H. were  
597 employed at UAntwerp at the time of the study, but are currently working at the R&D department of  
598 Yun NV, a start-up company resulting from this research ([www.yun.be](http://www.yun.be)). Based on the data presented  
599 here, YUN NV has selected and formulated three *Lactobacillus* strains, *L. pentosus* YUN-V1.0, *L.*

600 *plantarum* YUN-V2.0 and *L. rhamnosus* YUN-S1.0 in their commercial ACN product. Part of the results  
601 presented in this manuscript are included in patent applications PCT/EP2017/066176 and  
602 PCT/EP2017/065006.

603
